# Supplementary material for: Cocrystals of 5-fluorouracil
Source: Royal Society of Chemistry journal article supplement (doi:10.1039/c2ce26147b), 2012-09-03
Supplement: c2ce26147b.pdf [file c2ce26147b.pdf]

Table 1: Crystallographic data for the cocrystals **1a-1c**.

|                                                                     | <b>1a</b>                                                                                           | <b>1b</b>                                                                                                         | <b>1c</b>                                                                                                          |
|---------------------------------------------------------------------|-----------------------------------------------------------------------------------------------------|-------------------------------------------------------------------------------------------------------------------|--------------------------------------------------------------------------------------------------------------------|
| Formula                                                             | C <sub>13</sub> H <sub>9</sub> N: 2(C <sub>4</sub> H <sub>3</sub> F N <sub>2</sub> O <sub>2</sub> ) | C <sub>12</sub> H <sub>8</sub> N <sub>2</sub> : 2(C <sub>4</sub> H <sub>3</sub> F N <sub>2</sub> O <sub>2</sub> ) | C <sub>12</sub> H <sub>10</sub> N <sub>2</sub> : 4(C <sub>4</sub> H <sub>3</sub> F N <sub>2</sub> O <sub>2</sub> ) |
| Formula Wt.                                                         | 439.38                                                                                              | 440.37                                                                                                            | 702.56                                                                                                             |
| Crystal habit                                                       | Blocks                                                                                              | Rectangular Blocks                                                                                                | Blocks                                                                                                             |
| Crystal color                                                       | Yellow                                                                                              | Yellow                                                                                                            | Yellow                                                                                                             |
| Crystal system                                                      | Triclinic                                                                                           | Triclinic                                                                                                         | Monoclinic                                                                                                         |
| Space group                                                         | <i>P</i> $\bar{1}$                                                                                  | <i>P</i> $\bar{1}$                                                                                                | <i>P</i> 2 <sub>1</sub> / <i>c</i>                                                                                 |
| <i>a</i> (Å)                                                        | 6.794 (2)                                                                                           | 5.803 (2)                                                                                                         | 5.913 (1)                                                                                                          |
| <i>b</i> (Å)                                                        | 7.229 (2)                                                                                           | 7.626 (2)                                                                                                         | 22.137 (5)                                                                                                         |
| <i>c</i> (Å)                                                        | 9.568 (3)                                                                                           | 10.456 (3)                                                                                                        | 12.418 (3)                                                                                                         |
| $\alpha$ (deg)                                                      | 82.08 (2)                                                                                           | 83.07 (2)                                                                                                         | 90.00                                                                                                              |
| $\beta$ (deg)                                                       | 86.10 (2)                                                                                           | 79.37 (2)                                                                                                         | 117.85 (2)                                                                                                         |
| $\gamma$ (deg)                                                      | 85.92 (2)                                                                                           | 89.93 (2)                                                                                                         | 90.00                                                                                                              |
| <i>V</i> (Å <sup>3</sup> )                                          | 463.46 (2)                                                                                          | 451.38 (2)                                                                                                        | 1437.1(3)                                                                                                          |
| <i>Z</i>                                                            | 1                                                                                                   | 1                                                                                                                 | 2                                                                                                                  |
| <i>D</i> <sub>calc</sub> (g cm <sup>-3</sup> )                      | 1.574                                                                                               | 1.620                                                                                                             | 1.624                                                                                                              |
| <i>T</i> (K)                                                        | 180(2)                                                                                              | 180(2)                                                                                                            | 180(2)                                                                                                             |
| $\lambda$ (Mo-K $\alpha$ )                                          | 0.71073                                                                                             | 0.71073                                                                                                           | 0.71073                                                                                                            |
| $\mu$ (mm <sup>-1</sup> )                                           | 0.126                                                                                               | 0.131                                                                                                             | 0.139                                                                                                              |
| 2 $\theta$ range (deg)                                              | 64.08                                                                                               | 50.54                                                                                                             | 60.12                                                                                                              |
| Limiting indices                                                    | -10 ≤ <i>h</i> ≤ 10<br>-10 ≤ <i>k</i> ≤ 10<br>-14 ≤ <i>l</i> ≤ 14                                   | -6 ≤ <i>h</i> ≤ 6<br>-9 ≤ <i>k</i> ≤ 9<br>-10 ≤ <i>l</i> ≤ 12                                                     | -8 ≤ <i>h</i> ≤ 8<br>-31 ≤ <i>k</i> ≤ 29<br>-17 ≤ <i>l</i> ≤ 17                                                    |
| <i>F</i> (000)                                                      | 226                                                                                                 | 226                                                                                                               | 720                                                                                                                |
| No. of Reflns. Measured                                             | 9294                                                                                                | 4505                                                                                                              | 15157                                                                                                              |
| No. Unique Reflns.                                                  | 3206                                                                                                | 1628                                                                                                              | 4197                                                                                                               |
| No. of Reflns. Used                                                 | 2604                                                                                                | 1442                                                                                                              | 2907                                                                                                               |
| No. of Parameters                                                   | 146                                                                                                 | 145                                                                                                               | 226                                                                                                                |
| GOF on <i>F</i> <sup>2</sup>                                        | 1.047                                                                                               | 1.072                                                                                                             | 1.061                                                                                                              |
| <i>R</i> <sub>1</sub> [ <i>I</i> > 2 $\sigma$ ( <i>I</i> )]         | 0.0442                                                                                              | 0.0344                                                                                                            | 0.0486                                                                                                             |
| <i>wR</i> <sub>2</sub>                                              | 0.1194                                                                                              | 0.0975                                                                                                            | 0.1208                                                                                                             |
| Final diff. Fourier map (e <sup>-</sup> ·Å <sup>-3</sup> ) max, min | 0.281, -0.276                                                                                       | 0.218, -0.245                                                                                                     | 0.253, -0.251                                                                                                      |

Table 2: Bond length and angles of the hydrogen bonds observed in the cocrystals **1a-1c**.

| Hydrogen Bond, D-H...A | <b>1a</b> |      |     | <b>1b</b> |      |     | <b>1c</b> |      |     |
|------------------------|-----------|------|-----|-----------|------|-----|-----------|------|-----|
| N-H...N                |           |      |     |           |      |     | 2.00      | 2.86 | 164 |
|                        |           |      |     |           |      |     |           |      |     |
| N-H...O                | 1.90      | 2.77 | 172 | 1.91      | 2.78 | 171 | 1.88      | 2.76 | 175 |
|                        | 2.03      | 2.86 | 157 | 1.97      | 2.84 | 167 | 2.04      | 2.89 | 163 |
|                        |           |      |     |           |      |     | 2.12      | 2.99 | 170 |
| C-H...N                | 2.92      | 3.78 | 152 | 2.60      | 3.52 | 163 |           |      |     |
|                        |           |      |     |           |      |     |           |      |     |
| C-H...O                | 2.48      | 3.38 | 157 | 2.45      | 3.39 | 172 | 2.22      | 3.01 | 140 |
|                        | 2.84      | 3.51 | 129 |           |      |     | 2.41      | 3.23 | 144 |
|                        |           |      |     |           |      |     | 2.42      | 3.19 | 137 |
|                        |           |      |     |           |      |     | 2.42      | 3.24 | 145 |
|                        |           |      |     |           |      |     | 2.60      | 3.30 | 131 |
| C-H...F                | 2.50      | 3.45 | 176 | 2.41      | 3.32 | 160 | 2.64      | 3.50 | 150 |
|                        | 2.72      | 3.33 | 123 | 2.53      | 3.26 | 134 |           |      |     |

## DSC:

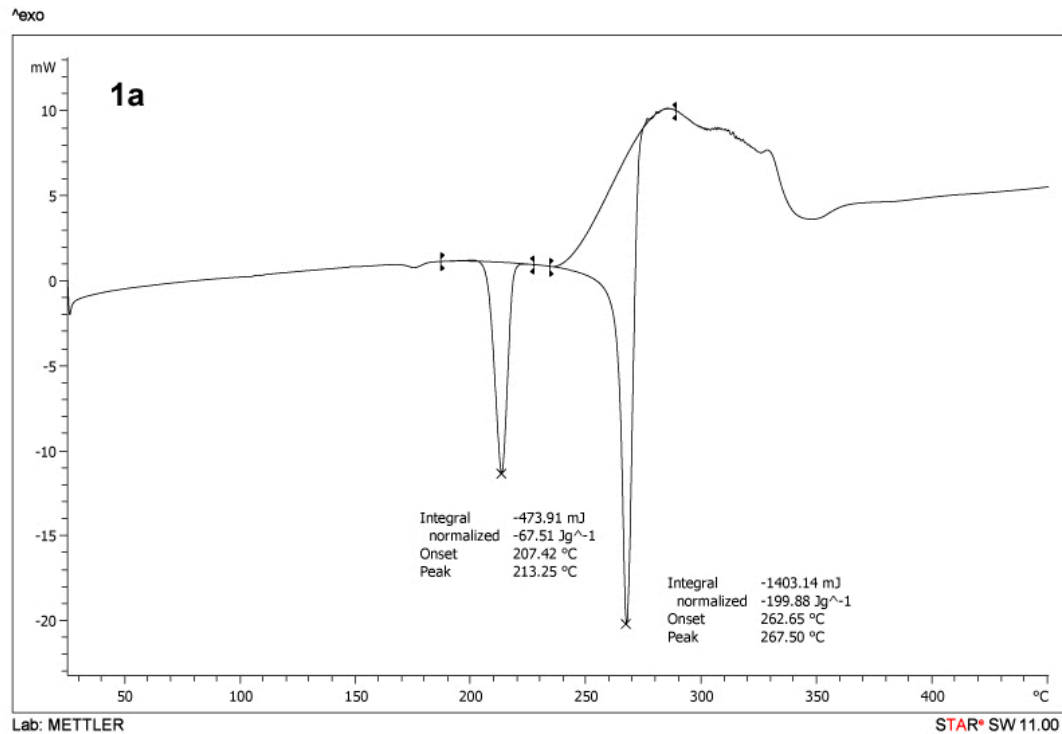

DSC of cocrystal between 5-fluorouracil+acridine

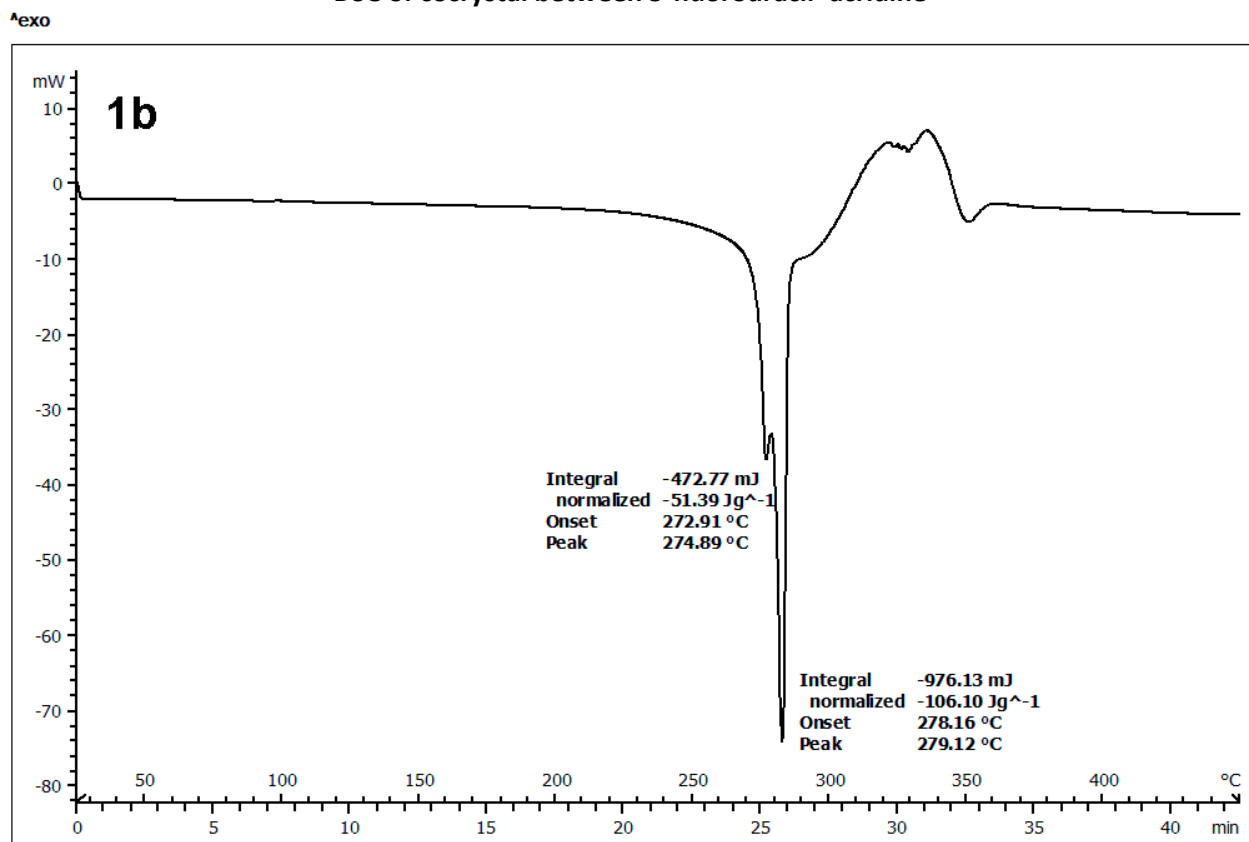

DSC of cocrystal between 5-fluorouracil+phenazine

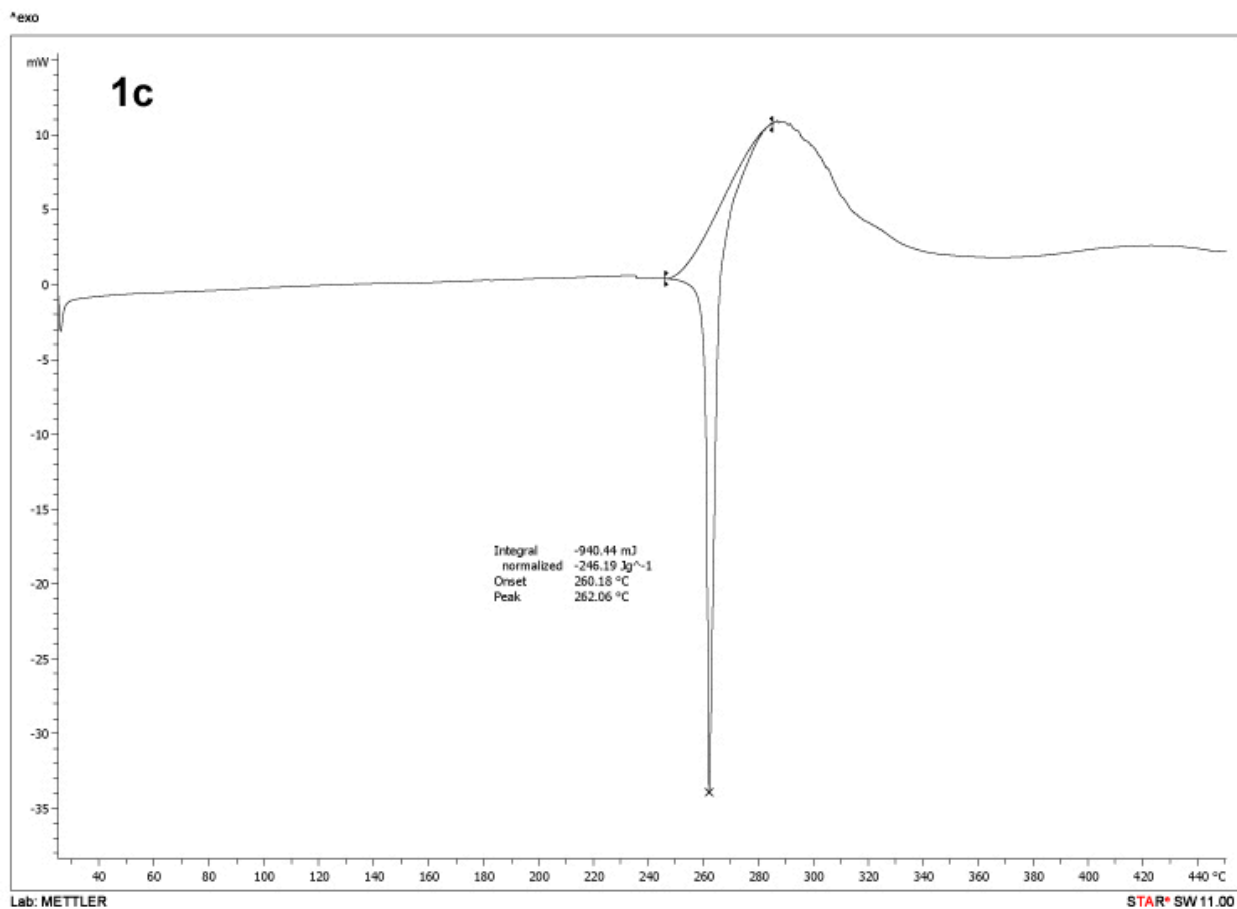

DSC of cocrystal between 5-fluorouracil+4,4-bispyridylethene

## TGA:

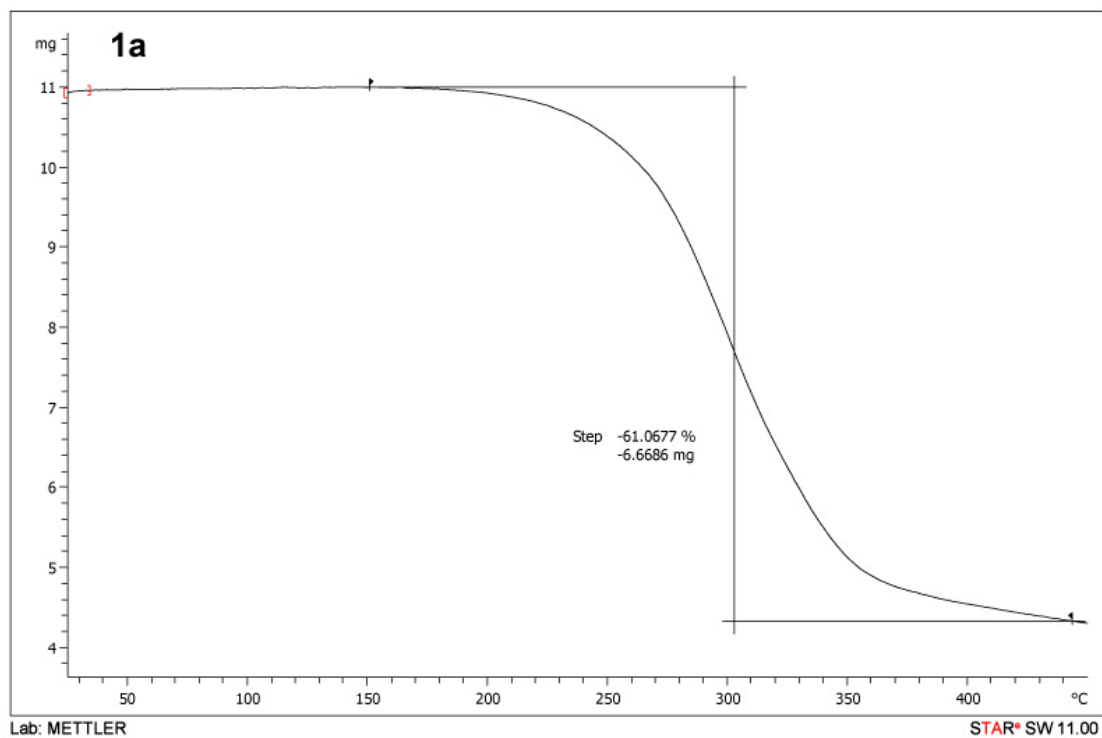

TGA of cocrystal between 5-fluorouracil+acridine

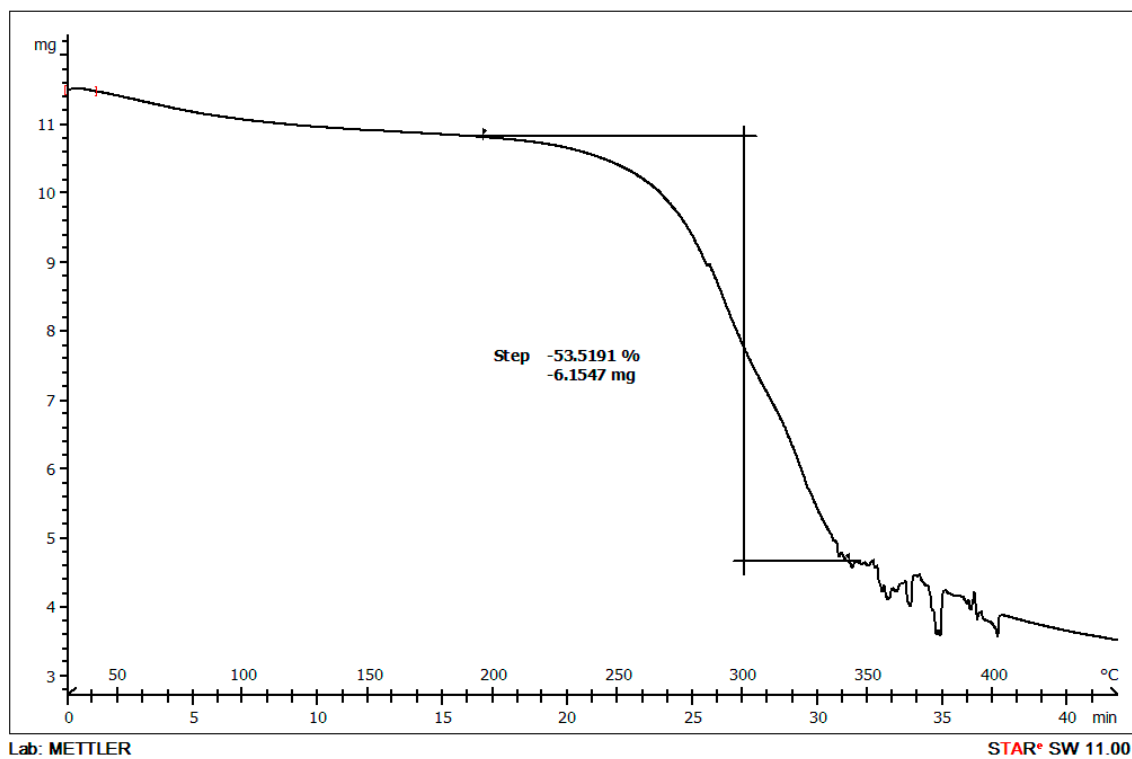

TGA of cocrystal between 5-fluorouracil+ phenazine

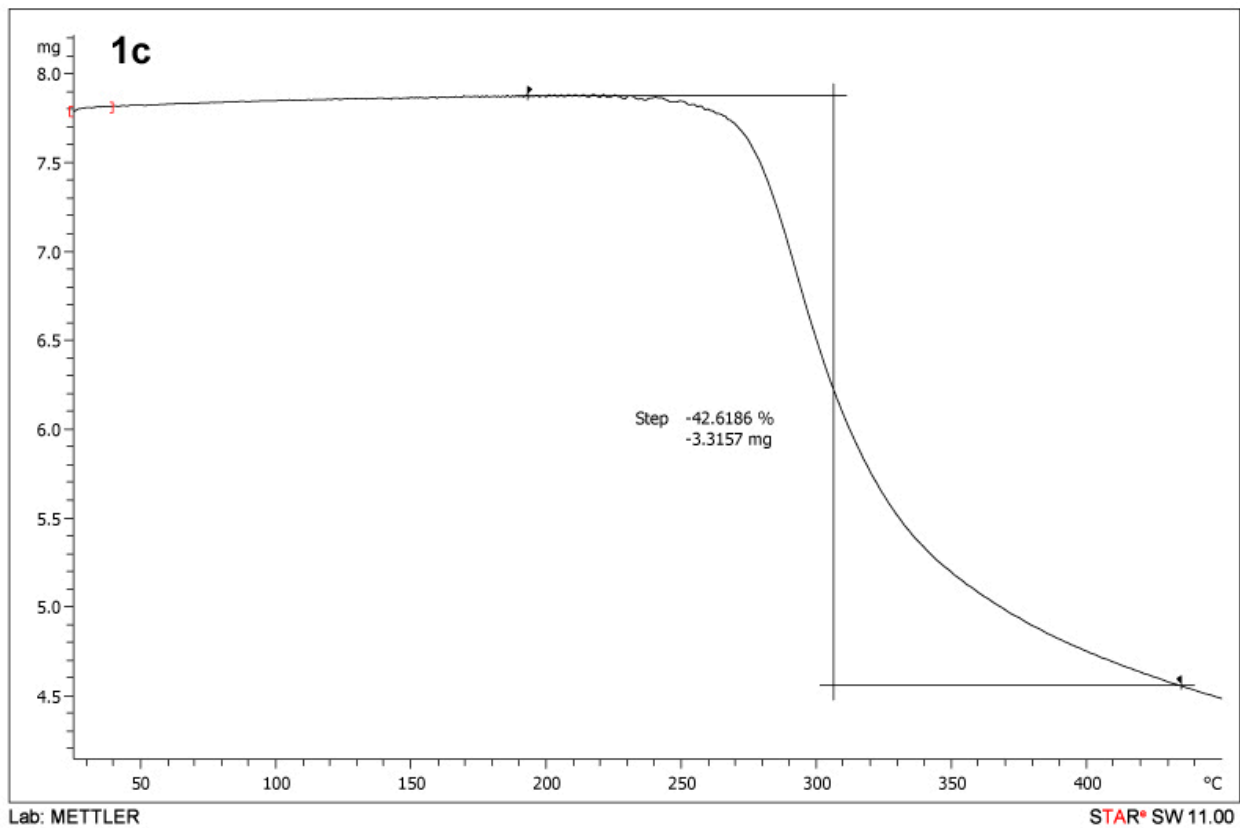

TGA of cocrystal between 5-fluorouracil+4,4'- bispyridylethene

## TEM details

Transmission electron microscopy characterization was performed at room temperature on a Philips CM30 instrument operating at 300 kV. Images and diffraction patterns were typically recorded using a magnification of 3,900x and camera length of 650 mm respectively. Data were collected on photographic films which were scanned in order to generate digital images. Samples were supported on holey-carbon films on 300 mesh copper grids held within a double tilt sample holder. The diffraction patterns were indexed by comparison with crystal structures held in the Cambridge Structural Database (CSD). The positions of reflections in experimental diffraction patterns were measured, converted to d-spacings and matched to calculated values for these CSD structures. The experimental diffraction patterns were then compared with simulated diffraction patterns of the appropriate zone axes to ensure a match. The simulations were carried out using CrystalMaker SingleCrystal v2.1.3 software which performs a rapid, kinematic calculation of the diffraction pattern.
